# Supplementary material
Source: HighWire-hosted journal article supplement (https://www.cmaj.ca/highwire/filestream/58467/field_highwire_adjunct_files/0/pg471.pdf)
Supplement: pg471.pdf [file pg471.pdf]

## PRODUCTION

**Production Manager • Gestionnaire de la production**  
Kathryn A. Freamo

**Production Assistants • Assistantes à la production**  
Nicole Barbeau, Lianne Johnsen, Carole Lalonde

## ADVERTISING • PUBLICITÉ

**Manager, Journal Advertising**  
**Gestionnaire, Annonces publicitaires**  
Beverley Kirkpatrick

**Coordinator, Display Advertising**  
**Coordonnatrice de la publicité**  
Nancy Pope

**Assistant Manager, Classified Advertising**  
**Gestionnaire adjointe, annonces classées**  
Deborah Rodd

613 731-9331, fax 613 565-7488  
advertising@cma.ca

For information on how to advertise  
in any of the CMA journals  
[www.cma.ca](http://www.cma.ca)

Pour savoir comment placer une annonce  
dans les revues publiées par l'AMC  
[www.cma.ca](http://www.cma.ca)

**Marketing and Advertising Sales**  
**Marketing et publicité**  
Keith Health Care Inc.

|                  |                  |
|------------------|------------------|
| <b>Toronto</b>   | <b>Montréal</b>  |
| 905 278-6700     | 514 624-6979     |
| 800 661-5004     | 877 761-0447     |
| fax 905 278-4850 | fax 514 624-6707 |

All prescription drug advertisements have been cleared by the Pharmaceutical Advertising Advisory Board.

Toutes les annonces de médicaments prescrits ont été approuvées par le Conseil consultatif de publicité pharmaceutique.

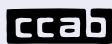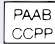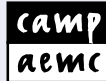

**ASSOCIATION  
MÉDICALE  
CANADIENNE**

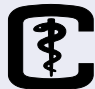

**CANADIAN  
MEDICAL  
ASSOCIATION**

**President • Président**  
Hugh Scully, MD CM, SMc

**Secretary General • Secrétaire général**  
Peter W. Vaughan, MD, MPH

**Director, Professional Development**  
**Directeur, Développement professionnel**  
Barbara Drew

**Manager, Publishing Services**  
**Gestionnaire, Services de publication**  
Jill Rafuse

**Publications Committee • Comité des publications**  
Stuart M. MacLeod, MD (Chairman • Président)  
Henry Haddad, MD  
Philip F. Hall, MD  
Barbara P. Lent, MD  
D'Arcy Lawrence Little, MD  
Jonathan L. Meakins, MD  
Mark Roper, MD  
W. Grant Thompson, MD

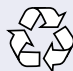

Printed on recycled paper • Imprimé sur papier recyclé

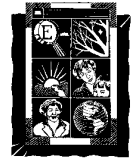

## Les gratte-papier et les résidents

Tout juste avant le début de l'année de résidence en juillet, une résistance qui durait depuis longtemps contre la mise en œuvre de frais de scolarité à l'échelon de la résidence est passée au stade critique lorsque des internes de Toronto ont refusé de payer les nouveaux frais de 1950 \$. L'université a maintenu que les frais étaient justifiés. Des associations de médecins comme l'APIRO, l'Association médicale de l'Ontario et l'AMC, qui font toutes face à ce problème depuis 1995, ont appuyé les résidents. En fin de compte, le ministère de la Santé de l'Ontario a convenu de couvrir le montant des frais de scolarité, du moins pour cette année. Nous résumons ailleurs (pages 478 et 479) la situation au Canada et à l'Université de Toronto.

Les frais de scolarité ont représenté presque 22 % du milliard de dollars de revenus déclarés par l'Université de Toronto pour l'exercice 1998. Les frais imposés aux résidents en médecine auraient généré pour l'université un revenu de 411 450 \$ la première année et de 4 à 5 fois plus élevé une fois mis en œuvre pour toutes les années de résidence. Nous supposons que ces fonds seraient virés à la faculté de médecine.

Pourquoi les facultés de médecine ont-elles besoin de plus d'argent? En dépit de dons records, les contributions gouvernementales ont diminué régulièrement. Au cours de l'exercice 1998, l'Université de Toronto a reçu 450 millions de dollars du gouvernement (46 % de ses revenus totaux), comparativement à 479 millions au cours de l'exercice 1997 (52 % de ses revenus). Les budgets des hôpitaux universitaires sont en outre de plus en plus scrutés à la loupe. Leurs coûts par jour-patient, plus élevés que dans les hôpitaux sans enseignement, sont de plus en plus difficiles à justifier et à maintenir. Le financement accordé par les gouvernements à tous les hôpitaux a diminué considérablement. Les enseignants doivent compter davantage sur leur revenu clinique, qui est aussi de plus en plus difficile à trouver. La réduction de l'appui gouvernemental à l'enseignement supérieur et aux soins de santé a obligé à sabrer dans les programmes, à transférer aux étudiants le fardeau de l'éducation et à réduire l'effectif enseignant et son revenu.

Il y a eu des tentatives légitimes visant à rationaliser la répartition de ressources toujours plus rares. Pendant cet exercice, les gratte-papier — peut-être à contrecœur — sont descendus dans les salles. Bien entendu, il est plus facile pour des comptables de suivre les coûts d'un produit concret comme un pneu en caoutchouc ou un ananas. L'éducation est beaucoup plus difficile à comptabiliser. Le département de médecine du Centre médical Columbia-Presbyterian de New York a essayé de quantifier l'enseignement et la rémunération financière en demandant à ses enseignants de décrire leurs activités d'enseignement.<sup>1</sup> En un an (1992-1993), les 188 enseignants à plein temps ont consacré 46 086 heures (moyenne de 245 heures par personne par année) d'enseignement aux résidents et aux étudiants en médecine. Les médecins traitants en salle ont fourni presque 30 % de l'enseignement. La majeure partie (74 %) de la rémunération versée aux enseignants à plein temps provenait des revenus cliniques et 1 % seulement provenait des paiements versés par la faculté de médecine pour l'enseignement et l'administration. De tels rapports sous-estiment certainement le temps passé avec les résidents et les étudiants. De plus — ce qui complique encore davantage la comptabilité — les enseignants apprennent aussi des résidents et des étudiants, et tous bénéficient du prestige qu'entraîne leur nomination. Nous ne connaissons pas d'essais publiés visant à créer une comptabilité semblable des contributions des résidents à l'enseignement.

En fin de compte, le groupe de travail de l'Université de Toronto constitué pour trancher la controverse des frais de scolarité devra compter une partie de ses ananas. Il est toutefois improbable que la comptabilité fasse découvrir la solution. L'enseignement et l'apprentissage produisent des avantages intangibles difficiles à convertir en dollars. L'enseignement de la médecine doit demeurer à la fois un privilège et un devoir, tant pour les enseignants que pour les résidents.

### Référence

1. Shea S, Nickerson KG, Tenenbaum J, Morris TQ, Rabinowitz D, O'Donnell K, et al. Compensation to a department of medicine and its faculty members for the teaching of medical students and house staff. *N Engl J Med* 1996;334:162-7.
